# Supplementary material
Source: PubMed Central journal article supplement (PMC4040600)
Supplement: 1402914111_pnas.201402914SI.pdf [file 1402914111_pnas.201402914SI.pdf]

# Supporting Information

Shand et al. 10.1073/pnas.1402914111

## SI Materials and Methods

**Cell Preparation.** Mice were anesthetized with isoflurane, and peripheral blood was collected via terminal cardiac puncture with heparin as an anticoagulant. In adoptive transfer experiments, mice were perfused with 30 mL PBS following blood collection. The spleen and tumor were weighed before being cut into small fragments and digested for 1 h at 37 °C with 0.2% collagenase D (Roche) for the spleen or with a mix of 300 U/mL crude collagenase (Sigma-Aldrich), 1 mg/mL Dispase II (Roche), and 2,000 U/mL DNase I (Calbiochem) for the tumor tissue. In some experiments, spleen cells were prepared by mechanical dissociation only (gentle forcing through a nylon mesh using the rubber tip of a syringe plunger). When present, necrotic tumor tissue (identified as darker tissue with a loose gel-like consistency located at the core of the tumor) was separated from solid tumor tissue by aspiration and gentle scraping. After digestion, tumor tissue was underlaid with 40% (vol/vol) Percoll and subjected to further separation by density centrifugation. Bone marrow (BM) cells were extracted from both femurs (separately for femur photo-conversion mice) by flash centrifugation or flushing with a needle and syringe. The resulting blood, spleen, tumor, and BM preparations were triturated by pipette, red blood cells were removed using ammonium-chloride-potassium lysing buffer [150 mM NH<sub>4</sub>Cl, 10 mM KHCO<sub>3</sub>, 0.1 mM Na<sub>2</sub>(EDTA)], and single-cell suspensions were obtained by passing each sample through a 70-μm cell strainer. Cells then were stored on ice before same-day analysis by flow cytometry.

**Flow Cytometry.** Flow-Count fluorospheres (Beckman Coulter) were used to determine cell numbers and normalize cell concentrations before antibody staining. Cells were resuspended in FACS buffer [PBS with 2% (vol/vol) FBS and 0.05% NaN<sub>3</sub>], incubated with anti-mouse CD16/CD32 monoclonal antibody (clone 93; BioLegend) for 5 min at room temperature to block nonspecific staining of Fc-receptors, and then stained with combinations of fluorophore- or biotin-conjugated anti-mouse monoclonal antibodies for 30 min at 4 °C, as indicated in Table S2. Biotin-conjugated antibody staining and streptavidin staining were performed sequentially. Stained cells were washed twice and passed through a 70-μm cell strainer before analysis.

Data were acquired on a Gallios flow cytometer (Beckman Coulter) and analyzed using FlowJo software (version 9.6.4; Tree-Star). Depending on the experiment, 100,000–2 million events were acquired. For Kikume Green-Red (KikGR) experiments, the standard Gallios filter configuration was adjusted to 620 dichroic short pass (DCSP)/590 bandpass (BP) for FL2 (KikGR-Red, KikRed), 730 DCSP/675 BP for FL3 (7-aminoactinomycin, 7-AAD), and no DCSP/755 BP for FL4 (phycoerythrin-cyanine 7, PE-Cy7). Monocytes, hematopoietic stem cells (HSCs), and granulocyte-macrophage progenitor (GMP) cells were identified as depicted in

Fig. S2. Doublets were excluded using a forward-scatter height (FSC-H) vs. forward-scatter width (FSC-W) gate. Nonviable cells were excluded based on FSC and side-scatter (SSC) profiles and 7-AAD staining (KikGR experiments) or propidium iodide staining [except in experiments using KikGR and fluorescent ubiquitination-based cell cycle indicator (Fucci) mice]. Flow cytometry data were visualized as 5% probability contour plots on linear scales (FSC and SSC channels) or log scales (fluorescence channels), with appropriate compensation and biexponential settings applied. Percentages shown within gates indicate the proportion of the parent population that is contained by the gate. Cell numbers were calculated as the total cell number for a tissue (as determined by Flow-Count fluorospheres) multiplied by the proportion of total cells occupied by the population of interest. KikRed gate positions were determined by calibration against unconverted control samples for each tissue, with a false-positive tolerance of 0.02–0.1%.

**Adoptive Transfer.** A pictorial representation of the adoptive transfer procedure is shown in Fig. 2D. Cells isolated from the BM or spleens of separate day-14 tumor-bearing CD45.1<sup>+</sup> CD45.2<sup>+</sup> or CD45.2<sup>+</sup> donors, respectively, were stained with biotin-conjugated monoclonal antibodies against CD3 (clone 145-2C11; BD Biosciences), CD11c (clone HL3; BD Biosciences), B220 (clone RA3-6B2; BD Biosciences), CD71 (clone RI7217; BioLegend), c-kit (clone 2B8; eBioscience), NK1.1 (clone PK136; BD Biosciences), Ly6G (clone 1A8; BioLegend), and Ter-119 (clone TER-119; BD Biosciences) and then were enriched by lineage depletion using an AutoMACS machine and Streptavidin MicroBeads (Miltenyi Biotec), according to the manufacturer's instructions. Enriched BM-derived and spleen-derived monocytes were mixed 1:1, labeled with carboxyfluorescein succinimidyl ester (5 μM, 37 °C, 5 min), then transferred i.v. into day-14 tumor-bearing CD45.1<sup>+</sup> recipients (5 × 10<sup>6</sup> cells per mouse). Recipient mouse blood and tumors were collected 4 h after transfer for analysis by flow cytometry.

**In Vitro Migration Assay.** Transwell migration assays were performed using the ChemoTx system (Neuro Probe) according to the manufacturer's instructions. Briefly, suspensions of 1.25 × 10<sup>6</sup> spleen cells in 25 μL RPMI medium 1640 with 0.5% BSA and 20 mM Hepes were applied to each well of a polycarbonate membrane plate (5-μm pore size). The membrane plate then was placed on a 96-well microplate containing 29 μL of culture medium per well with or without the chemokine CCL2 (Peprotech). After 2-h incubation at 37 °C, the number of cells in the lower chambers was measured by flow cytometer using Flow-Count fluorospheres and expressed as a proportion of the initially applied cell number.



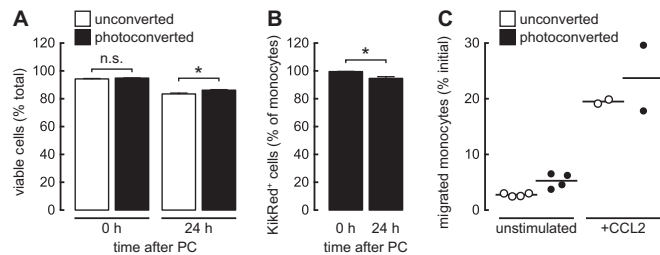

**Fig. S3.** KikGR photoconversion does not affect cell viability or migration potential, and KikRed protein levels remain stable over 24 h in monocytes. (A and B) BM cells from unconverted KikGR mice were photoconverted in vitro and analyzed by flow cytometry immediately (0 h) or after culture for 24 h at 37 °C. (A) Cell viability was assessed by measuring the proportion of cells staining negative for 7-AAD. (B) The stability of KikRed protein levels in Ly6C<sup>hi</sup> monocytes was assessed by measuring the proportion of KikRed<sup>+</sup> cells over time. (C) Spleen cells from unconverted wild-type mice or photoconverted KikGR mice were applied to the upper chamber of a Transwell migration assay in the presence or absence of CCL2 stimulation. Data represent the proportion of initially applied monocytes detected in the lower chamber after 2 h incubation at 37 °C. PC, photoconversion; n.s., not significant. \* $P \leq 0.05$ . Data represent means  $\pm$  SEM ( $n = 3$  in A and B or technical replicates in C) and are representative of two independent experiments.

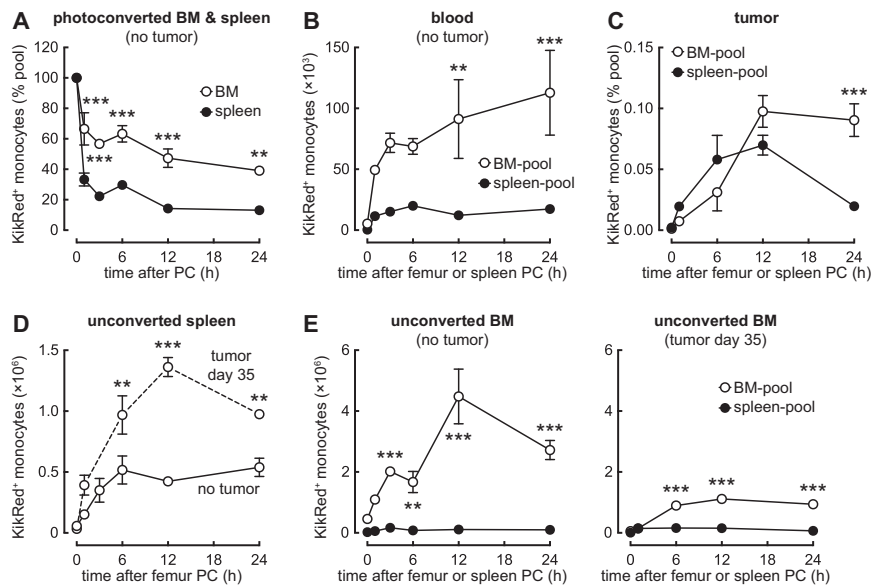

**Fig. S4.** Time-course graphs showing the redistribution of photoconverted Ly6C<sup>hi</sup> monocytes in non-tumor-bearing and tumor-bearing mice. (A) Egress of KikRed<sup>+</sup> Ly6C<sup>hi</sup> monocytes from the BM and spleen following photoconversion in non-tumor-bearing mice. Data are expressed as a proportion of the initial pool of photoconverted cells in each tissue. (B–E) Accumulation of KikRed<sup>+</sup> BM-pool and spleen-pool Ly6C<sup>hi</sup> monocytes in the blood of non-tumor-bearing mice (B), in the tumor (expressed relative to availability in respective source pools) (C), in the unconverted spleen in non-tumor-bearing mice and in day-35 tumor-bearing mice (D), and in the unconverted BM of non-tumor-bearing and day-35 tumor-bearing mice (E). Data from the 24-h time point in C are reproduced in Fig. 2A; data from the 12-h time points in D and E are reproduced in Fig. 4. PC, photoconversion. \*\* $P \leq 0.01$ ; \*\*\* $P \leq 0.001$  (BM-pool vs. spleen-pool). Data represent means  $\pm$  SEM ( $n = 3$ ) and are representative of two independent experiments.

**Table S1. Distribution of monocytes in KikGR BM chimeras**

|                          | Total monocytes* ( $\times 10^3$ ) |                    |
|--------------------------|------------------------------------|--------------------|
|                          | No tumor                           | Tumor day 35       |
| Blood <sup>†</sup>       | 188 $\pm$ 16                       | 183 $\pm$ 21       |
| Bone marrow <sup>†</sup> | 27,300 $\pm$ 2,700                 | 26,300 $\pm$ 2,000 |
| Spleen                   | 1,890 $\pm$ 200                    | 4,220 $\pm$ 550    |
| Tumor                    | —                                  | 165 $\pm$ 57       |

\*Mean cell number data  $\pm$  SEM ( $n = 6$ ) from nonphotoconverted or 0-h group mice (killed before photoconversion).

<sup>†</sup>Blood and BM data represent whole-body values.

| Marker/<br>antigen | Clone<br>(manufacturer*) | Fluorophore <sup>†</sup> or biotin conjugate |                      |                                  |                                 |                                          |
|--------------------|--------------------------|----------------------------------------------|----------------------|----------------------------------|---------------------------------|------------------------------------------|
|                    |                          | Wild-type mouse<br>experiments               | KikGR<br>experiments | Adoptive transfer<br>experiments | Fucci experiments—<br>monocytes | Fucci experiments—<br>HSCs and GMP cells |
| B220               | RA3-6B2 (BD)             |                                              | Biotin               |                                  | PerCP-Cy5.5                     | PerCP-Cy5.5                              |
| CD3                | 145-2C11 (BD)            |                                              |                      |                                  |                                 | PerCP-Cy5.5                              |
| CD11b              | M1/70 (BD)               | PE-Cy7                                       | PacificBlue          | PE-Cy7                           | PE-Cy7                          | PerCP-Cy5.5                              |
| CD11c              | HL3 (BD)                 |                                              | Biotin               |                                  |                                 |                                          |
| CD16/CD32          | 93 (BD)                  |                                              |                      |                                  |                                 | PE-Cy7                                   |
| CD34               | RAM34 (BD)               |                                              |                      |                                  |                                 | Biotin                                   |
| CD45.1             | A20 (BL)                 |                                              |                      | PacificBlue                      |                                 |                                          |
| CD45.2             | 104 (BL/eBio)            | PacificBlue                                  |                      | APC-eFluor780                    |                                 |                                          |
| c-kit              | 2B8 (eBio)               |                                              |                      |                                  |                                 | APC-A750                                 |
| Ly6A/E (Sca-1)     | E13-161.7 (BL)           |                                              |                      |                                  |                                 | PacificBlue                              |
| Ly6C               | HK1.4 (BL)               | PerCP-Cy5.5                                  | A647                 | A647                             | A647                            |                                          |
| Ly6G/C (Gr-1)      | RB6-8C5 (BD/BL)          | PE                                           | APC-Cy7              | PerCP-Cy5.5                      | APC-Cy7                         | PerCP-Cy5.5                              |
| NK1.1              | PK136 (BD)               | APC                                          | Biotin               |                                  | PerCP-Cy5.5                     | PerCP-Cy5.5                              |
| Streptavidin       | (BL)                     |                                              | PE-Cy7               |                                  |                                 | APC                                      |
| TCRβ               | H57-597 (eBio)           |                                              | Biotin               |                                  |                                 |                                          |
| Ter-119            | TER-119 (BD)             |                                              |                      |                                  |                                 | PerCP-Cy5.5                              |

\*Manufacturers: BD, BD Biosciences; BL, BioLegend; eBio, eBioscience.

<sup>†</sup>Fluorophores: A647, Alexa Fluor 647; APC, allophycocyanin; Cy, cyanin; FITC, fluorescein isothiocyanate; PerCP, peridinin chlorophyll; PE, phycoerythrin.
